# Supplementary material for: Spatial and Temporal Protein Modules Signatures Associated with Alzheimer Disease in 3xTg-AD Mice Are Restored by Early Ubiquinol Supplementation
Source: MDPI journal article supplement (doi:10.3390/antiox12030747), 2023-03-19
Supplement: s1 [file s1]

Table S1. Demographic and clinicopathological features of the patients used in the study.

| Patient number | Study area  | Diagnosis | Sex | Age | PMD (hh:mm) | Brain weight (grs) | Braak tau stage | Disease duration (years) | Cause of death                                                               |
|----------------|-------------|-----------|-----|-----|-------------|--------------------|-----------------|--------------------------|------------------------------------------------------------------------------|
| 1              | Hippocampus | NP        | F   | 62  | 2:00        | 1050               | -               | -                        | Cardiorespiratory arrest (immediate), multi-organic failure (secondary)      |
| 2              |             | NP        | F   | 59  | 2:00        | 1200               | -               | -                        | Severe acute pancreatitis (immediate), cardiorespiratory arrests (secondary) |
| 3              |             | NP        | F   | 58  | 5:00        | 944                | 0               | -                        | Pneumonia                                                                    |
| 4              |             | AD        | F   | 78  | 5:50        | 1137               | III             | m.d.                     | m.d.                                                                         |
| 5              |             | AD        | F   | 84  | 17:00       | 1260               | III-IV          | 4                        | Cardiogenic shock; electrolyte disturbance                                   |
| 6              |             | AD        | F   | 69  | 8:20        | m.d.               | IV              | m.d.                     | Respiratory insufficiency                                                    |
| 7              |             | AD        | F   | 71  | 10:00       | 1006               | V               | 12                       | m.d.                                                                         |
| 8              |             | AD        | F   | 79  | 3:00        | 950                | VI              | 11                       | m.d.                                                                         |
| 9              |             | AD        | F   | 63  | 5:00        | 1000               | VI              | 9                        | Cardiorespiratory arrest                                                     |
| 10             | Cortex      | NP        | F   | 62  | 2:00        | 1050               | -               | -                        | Cardiorespiratory arrest (immediate), multi-organic failure (secondary)      |
| 11             |             | NP        | F   | 59  | 2:00        | 1200               | -               | -                        | Severe acute pancreatitis (immediate), cardiorespiratory arrests (secondary) |
| 12             |             | NP        | F   | 58  | 5:00        | 944                | 0               | -                        | Pneumonia                                                                    |
| 13             |             | AD        | F   | 78  | 5:50        | 1137               | III             | m.d.                     | m.d.                                                                         |
| 14             |             | AD        | F   | 90  | 12:20       | 1175               | III             | m.d.                     | Cerebral haemorrhage                                                         |
| 15             |             | AD        | F   | 84  | 17:00       | 1260               | III-IV          | 4                        | Cardiogenic shock; electrolyte disturbance                                   |
| 16             |             | AD        | F   | 87  | 5:00        | 1000               | V               | 3                        | Cardiorespiratory arrest (immediate), Alzheimer's disease (secondary)        |
| 17             |             | AD        | F   | 85  | 2:00        | 1150               | V               | 5                        | Cardiorespiratory arrest (immediate), senile dementia (secondary)            |
| 18             |             | AD        | F   | 78  | 0,083333333 | 1000               | V               | 3                        | Respiratory failure (immediate), community pneumonia (secondary)             |

AD: Alzheimer disease; NP: non pathology; F: female; m.d.: missing data.

Table S2. Protein inference after *m/z* filtering from heatmap hippocampus 6m

| Mass ( <i>m/z</i> ) | Near Mass Match | Gene name | Protein name                                                                                                       |
|---------------------|-----------------|-----------|--------------------------------------------------------------------------------------------------------------------|
| 702,40              | 702,41          | LRPPRC    | Leucine-rich PPR motif-containing protein, mitochondrial                                                           |
| 1050,55             | 1050,54         | PMVK      | Phosphomevalonate kinase                                                                                           |
|                     | 1050,54         | C8ORF55   | UPF0670 protein C8orf55                                                                                            |
|                     | 1050,55         | NDUFV1    | Isoform 1 of NADH dehydrogenase [ubiquinone] flavoprotein 1, mitochondrial                                         |
|                     | 1050,56         | CSNK2A1   | Casein kinase II subunit alpha'                                                                                    |
|                     | 1050,56         | ABHD14B   | Isoform 1 of Abhydrolase domain-containing protein 14B                                                             |
|                     | 1050,56         | TTN       | Titin isoform N2-A                                                                                                 |
|                     | 1050,56         | SPTBN1    | Isoform Long of Spectrin beta chain, brain 1                                                                       |
|                     | 1050,56         | LMOD1     | Isoform 1 of Leiomodin-1                                                                                           |
| 1063,55             | 1063,52         | PSMA5     | Proteasome subunit alpha type-5                                                                                    |
|                     | 1063,52         | d.n.f     | cDNA FLJ61158, highly similar to ADP-ribosylation factor-like protein 8B                                           |
|                     | 1063,55         | d.n.f     | Similar to complement component C3, partial                                                                        |
|                     | 1063,55         | d.n.f     | Complement C3 (Fragment)                                                                                           |
|                     | 1063,56         | CPT2      | Carnitine O-palmitoyltransferase 2, mitochondrial                                                                  |
|                     | 1063,56         | CRTAP     | Cartilage-associated protein                                                                                       |
|                     | 1063,56         | HAGH      | Isoform 1 of Hydroxyacylglutathione hydrolase, mitochondrial                                                       |
| 1153,60             | 1153,59         | d.n.f     | cDNA FLJ56452, highly similar to Echinoderm microtubule-associated protein-like 2                                  |
|                     | 1153,59         | OAS3      | 2'-5'-oligoadenylate synthetase 3                                                                                  |
|                     | 1153,60         | RPL34     | 60S ribosomal protein L34                                                                                          |
|                     | 1153,60         | COPB2     | Coatomer subunit beta'                                                                                             |
|                     | 1153,60         | MPV17     | Isoform 1 of Mitochondrial inner membrane protein                                                                  |
|                     | 1153,60         | MPV17     | Isoform 1 of Mitochondrial inner membrane protein                                                                  |
|                     | 1153,60         | FTH1      | Ferritin heavy chain                                                                                               |
|                     | 1153,60         | CHMP4B    | Charged multivesicular body protein 4b                                                                             |
|                     | 1153,61         | RALY      | RNA binding protein, autoantigenic (HnRNP-associated with lethal yellow homolog (Mouse)), isoform CRA_a (Fragment) |
|                     | 1153,61         | MCM4      | DNA replication licensing factor MCM4                                                                              |
| 1054,55             | 1054,54         | SNRPF     | Small nuclear ribonucleoprotein F                                                                                  |
|                     | 1054,55         | CASP7     | Isoform Alpha of Caspase-7                                                                                         |
|                     | 1054,55         | SCYL1     | Isoform 4 of N-terminal kinase-like protein                                                                        |
|                     | 1054,55         | d.n.f     | cDNA FLJ41755 fis, clone HSYA2009102, highly similar to Adenosine 3'-phospho 5'-phosphosulfate transporter 1       |
|                     | 1054,55         | PGA3      | Pepsinogen 3, group I                                                                                              |
|                     | 1054,56         | d.n.f     | cDNA FLJ46199 fis, clone TESTI4007965, highly similar to AP-1 complex subunit gamma-1                              |
|                     | 1054,56         | d.n.f     | cDNA FLJ46199 fis, clone TESTI4007965, highly similar to AP-1 complex subunit gamma-1                              |
|                     | 1054,56         | RPS11     | 40S ribosomal protein S14                                                                                          |
|                     | 1054,56         | CRYZ      | Quinone oxidoreductase                                                                                             |
| 1040,55             | 1040,54         | HADHA     | Trifunctional enzyme subunit alpha, mitochondrial                                                                  |
|                     | 1040,55         | DHRS2     | Dehydrogenase/reductase member 2 isoform 2                                                                         |
|                     | 1040,55         | ITIH5     | Inter-alpha trypsin inhibitor heavy chain precursor 5 isoform 1                                                    |
|                     | 1040,55         | NPEPPS    | Puromycin-sensitive aminopeptidase                                                                                 |
| 1039,55             | 1039,53         | RPL26     | 60S ribosomal protein L26                                                                                          |
|                     | 1039,53         | EEF2      | Elongation factor 2                                                                                                |
|                     | 1039,55         | d.n.f     | cDNA FLJ55809                                                                                                      |
|                     | 1039,56         | DYNC1H1   | Cytoplasmic dynein 1 heavy chain 1                                                                                 |
| 1068,55             | 1068,55         | EIF4A2    | Isoform 1 of Eukaryotic initiation factor 4A-II                                                                    |
|                     | 1068,55         | EIF4A1    | Eukaryotic initiation factor 4A-I                                                                                  |
| 1022,55             | 1022,54         | STX12     | Syntaxin-12                                                                                                        |
|                     | 1022,55         | PALLD     | Isoform 4 of Palladin                                                                                              |
|                     | 1022,56         | d.n.f     | cDNA, FLJ96508, Homo sapiens SH3-domain GRB2-like 1 (SH3GL1), mRNA                                                 |
| 1021,55             | 1021,54         | COL6A2    | Isoform 2C2 of Collagen alpha-2(VI) chain                                                                          |
|                     | 1021,55         | FLII      | Protein flightless-1 homolog                                                                                       |
|                     | 1021,55         | MCM2      | DNA replication licensing factor MCM2                                                                              |
|                     | 1021,55         | GLUD1     | Glutamate dehydrogenase 1, mitochondrial                                                                           |
|                     | 1021,56         | DDX17     | Isoform 4 of Probable ATP-dependent RNA helicase DDX17                                                             |
| 851,60              | N/A             | d.n.f     | d.n.f                                                                                                              |
| 850,60              | N/A             | d.n.f     | d.n.f                                                                                                              |
| 1113,65             | 1113,64         | MYH11     | Myosin-11                                                                                                          |
|                     | 1113,65         | CCDC47    | Isoform 1 of Coiled-coil domain-containing protein 47                                                              |
|                     | 1113,65         | LAMB2     | Laminin subunit beta-2                                                                                             |
|                     | 1113,66         | BAG6      | Isoform 1 of Large proline-rich protein BAT3                                                                       |
|                     | 1113,66         | d.n.f     | 482 kDa protein                                                                                                    |
|                     | 1113,66         | GYG1      | Isoform GN-1L of Glycogenin-1                                                                                      |

|         |         |               |                                                                                                          |
|---------|---------|---------------|----------------------------------------------------------------------------------------------------------|
| 1295,70 | 1295,68 | CAND1         | Isoform 1 of Cullin-associated NEDD8-dissociated protein 1                                               |
|         | 1295,68 | KPNB1         | Importin subunit beta-1                                                                                  |
|         | 1295,69 | MAPKBP1       | Isoform 1 of Mitogen-activated protein-binding protein-interacting protein                               |
| 727,45  | 727,45  | VIL1          | Villin-1                                                                                                 |
|         | 727,45  | LAMA5         | Laminin subunit alpha-5                                                                                  |
| 1175,70 | 1175,68 | ARPC4         | Actin-related protein 2/3 complex subunit 4                                                              |
|         | 1175,69 | TTN           | Titin isoform N2-A                                                                                       |
| 971,60  | 971,59  | COL14A1       | Isoform 1 of Collagen alpha-1(XIV) chain                                                                 |
|         | 971,59  | GALNT5        | Polypeptide N-acetylgalactosaminyltransferase 5                                                          |
|         | 971,59  | RAP2B         | Ras-related protein Rap-2b                                                                               |
|         | 971,59  | RAP2C         | Ras-related protein Rap-2c                                                                               |
|         | 971,59  | ALDOA         | Fructose-bisphosphate aldolase A                                                                         |
|         | 971,59  | CLUH          | KIAA0664 Protein                                                                                         |
|         | 971,60  | FBXL18        | F-box/LRR-repeat protein 8                                                                               |
|         | 971,61  | EEF2          | Elongation factor 2                                                                                      |
|         | 971,61  | SRPRA         | Signal recognition particle receptor subunit alpha                                                       |
| 764,40  | 764,40  | GMD5          | GDP-mannose 4,6 dehydratase                                                                              |
|         | 764,41  | IARS1         | Isoleucyl-tRNA synthetase, cytoplasmic                                                                   |
| 1155,60 | 1155,59 | TTN           | Titin isoform N2-A                                                                                       |
|         | 1155,60 | RUVBL2        | RuvB-like 2                                                                                              |
|         | 1155,61 | PLCD1         | 1-phosphatidylinositol-4,5-bisphosphate phosphodiesterase delta-1                                        |
| 865,50  | 865,51  | DNM2          | Isoform 1 of Dynamin-2                                                                                   |
| 1435,75 | 1435,74 | KRT6B         | Keratin, type II cytoskeletal 6B                                                                         |
|         | 1435,74 | HNRNPG        | Heterogeneous nuclear ribonucleoprotein G                                                                |
|         | 1435,74 | DARS1         | Aspartyl-tRNA synthetase, cytoplasmic                                                                    |
|         | 1435,75 | ATP5F1B       | ATP synthase subunit beta, mitochondrial                                                                 |
|         | 1435,75 | GSDMB         | Isoform 3 of Gasdermin-B                                                                                 |
|         | 1435,75 | PAFAH1B3      | Platelet-activating factor acetylhydrolase IB subunit gamma                                              |
|         | 1435,76 | d.n.f         | HLA class II histocompatibility antigen, DR alpha chain                                                  |
|         | 1435,76 | d.n.f         | UPF0727 protein C6orf115                                                                                 |
|         | 1435,76 | TPT1          | Tumor protein, translationally-controlled 1                                                              |
| 1110,60 | 1110,59 | d.n.f         | 265 kDa protein                                                                                          |
|         | 1110,59 | SAMM50        | Sorting and assembly machinery component 50 homolog                                                      |
|         | 1110,60 | DCXR          | L-xylulose reductase                                                                                     |
|         | 1110,60 | SERPINA1<br>A | Isoform 1 of Alpha-1-antitrypsin                                                                         |
| 1161,60 | 1161,59 | COL14A1       | Isoform 1 of Collagen alpha-1(XIV) chain                                                                 |
|         | 1161,59 | NDUFS1        | NADH-ubiquinone oxidoreductase 75 kDa subunit                                                            |
|         | 1161,59 | d.n.f         | Isoform 1 of Protein KIAA1967                                                                            |
|         | 1161,59 | AACS          | Isoform 1 of Acetoacetyl-CoA synthetase                                                                  |
|         | 1161,61 | LPCAT3        | Lysophospholipid acyltransferase 5                                                                       |
| 833,45  | 833,45  | FHL1          | Isoform 1 of Four and a half LIM domains protein 1                                                       |
|         | 833,46  | DLAT          | Dihydrolipoyllysine-residue acetyltransferase component of pyruvate dehydrogenase complex, mitochondrial |
|         | 833,46  | GPD2          | Isoform 1 of Glycerol-3-phosphate dehydrogenase, mitochondrial                                           |
|         | 833,46  | d.n.f         | Putative uncharacterized protein PSME2                                                                   |
| 1339,75 | 1339,76 | DDX42         | Isoform 1 of ATP-dependent RNA helicase DDX42                                                            |
|         | 1339,76 | PRKDC         | Isoform 1 of DNA-dependent protein kinase catalytic subunit                                              |
| 920,50  | 920,49  | d.n.f         | cDNA FLJ53324, highly similar to Tight junction protein ZO-2                                             |
|         | 920,51  | PRDX1         | Peroxiredoxin-1                                                                                          |
|         | 920,51  | RPS29         | 40S ribosomal protein S29                                                                                |
|         | 920,51  | DSG2          | Desmoglein-2                                                                                             |
|         | 920,51  | PRDX4         | Peroxiredoxin-4                                                                                          |
| 1109,60 | 1109,59 | COPG1         | Coatmer subunit gamma                                                                                    |
|         | 1109,60 | PYGM          | Glycogen phosphorylase, muscle form                                                                      |
|         | 1109,61 | RHOT2         | Isoform 1 of Mitochondrial Rho GTPase 2                                                                  |
|         | 1109,61 | XRCC5         | ATP-dependent DNA helicase 2 subunit 2                                                                   |
| 1340,75 | 1340,74 | MPO           | Isoform H17 of Myeloperoxidase                                                                           |
|         | 1340,74 | MRPL4         | Isoform 1 of 39S ribosomal protein L4, mitochondrial                                                     |
| 1453,80 | 1453,79 | CCT8          | T-complex protein 1 subunit theta                                                                        |
|         | 1453,79 | TWF1          | Isoform 3 of Twinfilin-1                                                                                 |
|         | 1453,80 | NEB           | Nebulin isoform 1                                                                                        |
| 1154,60 | 1154,59 | COL6A3        | COL6A3 protein                                                                                           |
|         | 1154,59 | COL6A3        | Isoform 1 of Collagen alpha-3(VI) chain                                                                  |
|         | 1154,60 | CAT           | Catalase                                                                                                 |
|         | 1154,60 | LCP1          | Plastin-2                                                                                                |
|         | 1154,60 | PLS3          | Plastin-3                                                                                                |
| 726,45  | 726,45  | BAX           | Isoform Alpha of Apoptosis regulator BAX                                                                 |
|         | 726,45  | CAND1         | Isoform 1 of Cullin-associated NEDD8-dissociated protein 1                                               |

|         |         |         |                                                                     |
|---------|---------|---------|---------------------------------------------------------------------|
| 921,50  | 921,50  | CRYAB   | Alpha-crystallin B chain                                            |
|         | 921,50  | PSMD12  | 26S proteasome non-ATPase regulatory subunit 12                     |
|         | 921,50  | BLVRA   | Biliverdin reductase A                                              |
|         | 921,50  | OXCT1   | Succinyl-CoA:3-ketoacid-coenzyme A transferase 1, mitochondrial     |
|         | 921,52  | RPL28   | 60S ribosomal protein L28                                           |
|         | 921,52  | MCM4    | DNA replication licensing factor MCM4                               |
|         | 921,52  | ACADSB  | Short/branched chain specific acyl-CoA dehydrogenase, mitochondrial |
|         | 921,52  | KIF5B   | Kinesin-1 heavy chain                                               |
| 738,40  | NO ID   | d.n.f   | d.n.f                                                               |
| 701,45  | 701,46  | UBE2V1  | Isoform 3 of Ubiquitin-conjugating enzyme E2 variant 1              |
|         | 701,46  | FUBP1   | Isoform 1 of Far upstream element-binding protein 1                 |
| 990,55  | 990,54  | IER3IP1 | Immediate early response 3-interacting protein 1                    |
|         | 990,54  | COL11A2 | Isoform 1 of Collagen alpha-2(XI) chain                             |
|         | 990,56  | CAPSL   | Calcyphosin                                                         |
|         | 990,56  | SARS    | Seryl-tRNA synthetase                                               |
|         | 990,57  | HADHB   | Trifunctional enzyme subunit beta, mitochondrial                    |
|         | 990,57  | GAA     | Lysosomal alpha-glucosidase                                         |
| 1046,60 | N/A     | d.n.f   | d.n.f                                                               |
| 966,55  | 966,54  | RPL24   | 19 kDa protein                                                      |
|         | 966,54  | RDH10   | Retinol dehydrogenase 10                                            |
|         | 966,57  | P4HB    | Protein disulfide-isomerase                                         |
|         | 966,57  | d.n.f   | Putative uncharacterized protein P4HB                               |
| 1064,60 | 1064,59 | PRELP   | Prolargin                                                           |
|         | 1064,59 | VPS25   | Vacuolar protein-sorting-associated protein 25                      |
|         | 1064,60 | PDCD6IP | Programmed cell death 6-interacting protein                         |
|         | 1064,60 | EPPK1   | Epiplakin 1                                                         |
|         | 1064,60 | RPL23A  | 60S ribosomal protein L23a                                          |
|         | 1064,60 | ALDH1A1 | Retinal dehydrogenase 1                                             |
|         | 1064,61 | KRT19   | Keratin, type I cytoskeletal 19                                     |
|         | 1064,61 | TTN     | Titin isoform N2-A                                                  |
|         | 1064,61 | SORBS2  | Sorbin and SH3 domain containing 2 isoform 6                        |

d.n.f: data not found

Table S3. Protein inference after *m/z* filtering from top25 hippocampus 6m

| Mass ( <i>m/z</i> ) | Near Mass Match | Gene name | Protein name                                                                      |
|---------------------|-----------------|-----------|-----------------------------------------------------------------------------------|
| 726,80              | 726,45          | BAX       | Isoform Alpha of Apoptosis regulator BAX                                          |
|                     | 726,45          | CAND1     | Isoform 1 of Cullin-associated NEDD8-dissociated protein 1                        |
| 973,60              | 973,60          | H1-2      | Histone H1.2                                                                      |
|                     | 973,60          | H1-4      | Histone H1.4                                                                      |
|                     | 973,60          | H1-3      | Histone H1.3                                                                      |
|                     | 973,60          | NSF       | Vesicle-fusing ATPase                                                             |
| 1153,60             | 1153,60         | RPL34     | 60S ribosomal protein L34                                                         |
|                     | 1153,60         | TIMM50    | Isoform 1 of Mitochondrial inner membrane protein                                 |
|                     | 1153,60         | COPB1     | Coatomer subunit beta                                                             |
|                     | 1153,60         | FTH1      | Ferritin heavy chain                                                              |
|                     | 1153,60         | CHMP4B    | Charged multivesicular body protein 4b                                            |
| 808,4               | 808,41          | ACE       | Isoform Somatic-1 of Angiotensin-converting enzyme                                |
|                     | 808,41          | CTSG      | Cathepsin G                                                                       |
| 950,50              | 950,51          | SYNJ2BP   | Synaptojanin-2-binding protein                                                    |
| 938,50              | 938,51          | MYH11     | Myosin-11                                                                         |
|                     | 938,51          | MYH10     | Isoform 1 of Myosin-10                                                            |
|                     | 938,51          | XPO7      | Exportin 7 isoform c                                                              |
| 1063,55             | 1063,55         | d.n.f     | Similar to complement component C3, partial                                       |
|                     | 1063,55         | C3        | Complement C3 (Fragment)                                                          |
| 834,45              | 834,45          | SDH4      | Succinate dehydrogenase [ubiquinone] cytochrome b small subunit, mitochondrial    |
| 1028,60             | 1028,60         | FERMT3    | Isoform 2 of Fermitin family homolog 3                                            |
| 1002,65             | 1002,63         | PIR       | Pirin                                                                             |
|                     | 1002,63         | BCCIP     | Isoform 1 of BRCA2 and CDKN1A-interacting protein                                 |
| 943,65              | 943,58          | COX5A     | Cytochrome c oxidase subunit 5A, mitochondrial                                    |
| 969,60              | 969,61          | TAOK3     | Serine/threonine-protein kinase TAO3                                              |
|                     | 969,61          | PPME1     | Isoform 2 of Protein phosphatase methylesterase 1                                 |
| 1615,8              | 1615,80         | KRT78     | Isoform 1 of Keratin, type II cytoskeletal 78                                     |
| 723,4               | 723,45          | ATP5F1E   | ATP synthase subunit alpha, mitochondrial                                         |
| 992,70              | 992,58          | d.n.f     | cDNA FLJ35730 fis, clone TESTI2003131, highly similar to ALPHA-1-ANTICHYMOTRYPSIN |
| 900,60              | 900,59          | CALD1     | Isoform 1 of Caldesmon                                                            |
| 887,55              | 887,53          | ASPH      | Aspartyl/asparaginyl beta-hydroxylase                                             |
| 813,40              | 813,41          | FKBP4     | FK506-binding protein 4                                                           |
| 1359,85             | 1359,80         | PRDX1     | Peroxiredoxin-1                                                                   |
| 1108,70             | 1108,72         | LSM6      | U6 snRNA-associated Sm-like protein LSm6                                          |
| 1082,65             | 1082,67         | LAMB1     | Laminin subunit beta-2                                                            |
| 834,50              | 834,51          | CS        | Citrate synthase, mitochondrial                                                   |
| 1355,8              | 1355,79         | PYGL      | Glycogen phosphorylase, liver form                                                |
|                     | 1355,79         | SLC25A12  | Calcium-binding mitochondrial carrier protein Aralar1                             |
|                     | 1355,79         | ATIC      | Bifunctional purine biosynthesis protein PURH                                     |
| 741,50              | 741,52          | PSMD12    | 26S proteasome non-ATPase regulatory subunit 12                                   |
|                     | 741,52          | SAE1      | SUMO-activating enzyme subunit 1                                                  |
| 977,55              | 977,54          | SEC31A    | Isoform 3 of Protein transport protein Sec31A                                     |

d.n.f: data not found

Table S4. Protein inference after *m/z* filtering from heatmap cortex 6m

| Mass ( <i>m/z</i> ) | Near Mass Match | Gene name | Protein name                                                                                |
|---------------------|-----------------|-----------|---------------------------------------------------------------------------------------------|
| 1202,65             | 1204,64         | PHB2      | Prohibitin-2                                                                                |
|                     | 1204,64         | CNN1      | Calponin-1                                                                                  |
|                     | 1204,64         | RPL17     | 60S ribosomal protein L17                                                                   |
|                     | 1204,64         | d.n.f     | 149 kDa protein                                                                             |
|                     | 1204,64         | NUCB2     | Isoform 1 of Nucleobindin-2                                                                 |
| 990,55              | 1204,66         | MACROH2A1 | Isoform 3 of Core histone macro-H2A.1                                                       |
|                     | 1204,66         | EIF5      | Eukaryotic translation initiation factor 5                                                  |
|                     | 990,54          | IER3IP1   | Immediate early response 3-interacting protein 1                                            |
|                     | 990,54          | COL11A2   | Isoform 1 of Collagen alpha-2(XI) chain                                                     |
|                     | 990,56          | CAPSL     | Calcyphosin                                                                                 |
| 838,45              | 990,56          | SARS      | Seryl-tRNA synthetase                                                                       |
|                     | 838,45          | VCL       | Isoform 1 of Vinculin                                                                       |
|                     | 838,44          | d.n.f     | 149 kDa protein                                                                             |
|                     | 838,47          | AMPD2     | Adenosine monophosphate deaminase 2                                                         |
|                     | 838,47          | SRP68     | Isoform 1 of Signal recognition particle 68 kDa protein                                     |
| 724,50              | N/A             | d.n.f     | d.n.f                                                                                       |
| 1008,60             | 1008,59         | d.n.f     | cDNA FLJ44241 fis, clone THYMU3008436, highly similar to 6-phosphofructokinase, muscle type |
|                     | 1008,59         | PFKL      | Isoform 1 of 6-phosphofructokinase, liver type                                              |
|                     | 1008,59         | SERPINA1A | Isoform 1 of Alpha-1-antitrypsin                                                            |
| 808,35              | N/A             | d.n.f     | d.n.f                                                                                       |
| 858,45              | 858,46          | HSPA8     | Isoform 1 of Heat shock cognate 71 kDa protein                                              |
|                     | 858,47          | SLC25A20  | Mitochondrial carnitine/acylcarnitine carrier protein                                       |
| 1064,60             | 1064,60         | PDCD6IP   | Programmed cell death 6-interacting protein                                                 |
|                     | 1064,60         | EPPK1     | Epiplakin 1                                                                                 |
|                     | 1064,60         | RPL23A    | 60S ribosomal protein L23a                                                                  |
|                     | 1064,60         | ALDH1A1   | Retinal dehydrogenase 1                                                                     |
|                     | 1064,61         | KRT19     | Keratin, type I cytoskeletal 19                                                             |
|                     | 1064,61         | TTN       | Titin isoform N2-A                                                                          |
|                     | 1064,61         | SORBS2    | Sorbin and SH3 domain containing 2 isoform 6                                                |
|                     | 1064,59         | PRELP     | Prolargin                                                                                   |
|                     | 1064,59         | VPS25     | Vacuolar protein-sorting-associated protein 25                                              |
|                     | 1262,65         | ATXN10    | Ataxin-10                                                                                   |
|                     | 1262,65         | EFHD2     | EF-hand domain-containing protein D2                                                        |
|                     | 1262,65         | TTN       | Titin isoform N2-A                                                                          |
|                     | 1262,66         | PRKDC     | Isoform 1 of DNA-dependent protein kinase catalytic subunit                                 |
|                     | 1262,66         | MYH9      | Isoform 1 of Myosin-9                                                                       |
|                     | 1262,66         | CCT6A     | T-complex protein 1 subunit zeta                                                            |
| 1262,65             | 1262,66         | MYH11     | Myosin-11                                                                                   |
|                     | 1262,66         | CCT6A     | T-complex protein 1 subunit zeta                                                            |
|                     | 1262,66         | ACP1      | Isoform 1 of Low molecular weight phosphotyrosine protein phosphatase                       |
|                     | 1262,64         | CAPZB     | Isoform 2 of F-actin-capping protein subunit beta                                           |
|                     | 1262,64         | ATP5F1B   | ATP synthase subunit beta, mitochondrial                                                    |
|                     | 1355,65         | d.n.f     | 59 kDa protein                                                                              |
|                     | 1355,64         | ACSL3     | Long-chain-fatty-acid--CoA ligase 3                                                         |
|                     | 1355,66         | PPP1R12C  | Isoform 1 of Protein phosphatase 1 regulatory subunit 12C                                   |
|                     | 1355,66         | TUBB2A    | Tubulin beta-2A chain                                                                       |
|                     | 1355,66         | TTN       | Titin isoform N2-A                                                                          |
| 808,4               | 808,41          | ACE       | Isoform Somatic-1 of Angiotensin-converting enzyme                                          |
|                     | 808,41          | CTSG      | Cathepsin G                                                                                 |

d.n.f: data not found

Table S5. Protein inference after *m/z* filtering from top25 cortex 6m

| Mass ( <i>m/z</i> ) | Near Mass Match | Gene name | Protein name                                                     |
|---------------------|-----------------|-----------|------------------------------------------------------------------|
| 808,35              | 808,38          | ENO1      | Isoform alpha-enolase of Alpha-enolase                           |
| 1355,65             | 1355,64         | d.n.f     | 59 kDa protein                                                   |
|                     | 1355,64         | FAA3      | Long-chain-fatty-acid--CoA ligase 3                              |
|                     | 1355,66         | PPP1R12C  | Isoform 1 of Protein phosphatase 1 regulatory subunit 12C        |
|                     | 1355,66         | TUBB2A    | Tubulin beta-2A chain                                            |
|                     | 1355,66         | TTN       | Titin isoform N2-A                                               |
| 858,45              | 858,46          | HSPA8     | Isoform 1 of Heat shock cognate 71 kDa protein                   |
| 808,40              | 808,41          | ACE       | Isoform Somatic-1 of Angiotensin-converting enzyme               |
|                     | 808,41          | CTSG      | Cathepsin G                                                      |
| 1202,65             | 1202,65         | ARHGEF28  | Isoform 1 of Rho guanine nucleotide exchange factor 2            |
|                     | 1202,65         | d.n.f     | Putative uncharacterized protein KIF13B                          |
| 1008,6              | 1008,67         | VWF       | Isoform 1 of von Willebrand factor A domain-containing protein 1 |
| 1354,65             | 1354,65         | EML1      | Isoform 1 of Echinoderm microtubule-associated protein-like 1    |
| 971,50              | 971,50          | RPS3A     | 40S ribosomal protein S3a                                        |
| 1262,65             | 1262,65         | ATXN10    | Ataxin-10                                                        |
|                     | 1262,65         | EFHD2     | EF-hand domain-containing protein D2                             |
|                     | 1262,65         | TTN       | Titin isoform N2-A                                               |
| 990,55              | 990,54          | IER3IP1   | Immediate early response 3-interacting protein 1                 |
|                     | 990,54          | COL11A2   | Isoform 1 of Collagen alpha-2(XI) chain                          |
|                     | 990,56          | CAPS      | Calcyphosin                                                      |
|                     | 990,56          | SARS1     | Seryl-tRNA synthetase                                            |
| 724,50              | 724,39          | FLNA      | Isoform 2 of Filamin-A                                           |
| 1064,60             | 1064,60         | PDCD6IP   | Programmed cell death 6-interacting protein                      |
|                     | 1064,60         | EPPK1     | Epiplakin 1                                                      |
|                     | 1064,60         | RPL23A    | 60S ribosomal protein L23a                                       |
|                     | 1064,60         | ALDH1A1   | Retinal dehydrogenase 1                                          |
| 892,5               | 892,50          | COL1A2    | Collagen alpha-2(I) chain                                        |
|                     | 892,51          | FUBP3     | Isoform 1 of Far upstream element-binding protein 3              |
| 1203,70             | 1203,70         | TAGLN     | Transgelin                                                       |
| 921,50              | 921,50          | CRYAB     | Alpha-crystallin B chain                                         |
|                     | 921,50          | PSMD12    | 26S proteasome non-ATPase regulatory subunit 12                  |
|                     | 921,50          | BLVRA     | Biliverdin reductase A                                           |
|                     | 921,50          | OXCT1     | Succinyl-CoA:3-ketoacid-coenzyme A transferase 1, mitochondrial  |
| 1261,65             | 1261,65         | PYGB      | Glycogen phosphorylase, brain form                               |
|                     | 1261,65         | DUSP23    | Dual specificity protein phosphatase 23                          |
| 875,45              | 875,46          | ALG1      | Chitobiosyldiphosphodolichol beta-mannosyltransferase            |
| 856,55              | 856,55          | d.n.f     | UPF0553 protein C9orf64                                          |
|                     | 856,55          | ETFB      | Isoform 1 of Electron transfer flavoprotein subunit beta         |
| 1547,85             | 1547,85         | IDE       | Insulin-degrading enzyme                                         |
| 838,45              | 838,45          | VCL       | Isoform 1 of Vinculin                                            |
| 827,50              | 827,49          | VPS35     | Vacuolar protein sorting-associated protein 35                   |
| 890,55              | 890,55          | SOD3      | Extracellular superoxide dismutase [Cu-Zn]                       |
|                     | 890,55          | RRAS      | Ras-related protein R-Ras                                        |
|                     | 890,55          | SPON1     | Spondin-1                                                        |
|                     | 890,55          | ATP5PF    | ATP synthase-coupling factor 6, mitochondrial                    |
| 827,55              | 827,54          | IQGAP1    | Ras GTPase-activating-like protein                               |
|                     | 827,54          | LRPPRC    | Leucine-rich PPR motif-containing protein, mitochondrial         |
|                     | 827,54          | SAE1      | SUMO-activating enzyme subunit 1                                 |
|                     | 827,54          | SMC1A     | Structural maintenance of chromosomes protein 1A                 |
|                     | 827,54          | UBA1      | Isoform 1 of Ubiquitin-like modifier-activating enzyme 6         |
|                     | 827,55          | RPL8      | 60S ribosomal protein L8                                         |
| 731,45              | 731,45          | COPG1     | Coatomer subunit gamma 1                                         |
|                     | 731,45          | RPL30     | 60S ribosomal protein L30                                        |

|        |        |         |                                                                |
|--------|--------|---------|----------------------------------------------------------------|
| 723,40 | 723,45 | ATP5F1A | ATP synthase subunit alpha, mitochondrial                      |
|        | 723,48 | CPT1A   | Isoform 1 of Carnitine O-palmitoyltransferase 1, liver isoform |

---

d.n.f: data not found



Table S6. Protein inference after *m/z* filtering from heatmap hippocampus 12m

| Mass ( <i>m/z</i> ) | Near Mass Match | Gene name | Protein name                                                             |
|---------------------|-----------------|-----------|--------------------------------------------------------------------------|
| 1340,70             | 1340,70         | XPO1      | Exportin-1                                                               |
| 1340,72             | 1340,71         | MYLK      | Isoform 2 of Myosin light chain kinase, smooth muscle                    |
|                     | 1340,73         | MYH1      | Myosin-1                                                                 |
| 1339,7              | 1339,70         | FAM120A   | Isoform F of Constitutive coactivator of PPAR-gamma-like protein 1       |
|                     | 1339,70         | LRBA      | Isoform 2 of Lipopolysaccharide-responsive and beige-like anchor protein |
| 1339,74             | 1339,73         | FKBP4     | FK506-binding protein 4                                                  |
|                     | 1339,76         | DDX42     | Isoform 1 of ATP-dependent RNA helicase DDX42                            |
| 748,40              | 748,42          | d.n.f     | IPI00645488-R                                                            |
|                     | 748,42          | d.n.f     | IPI00645488-R                                                            |
| 1340,74             | 1340,74         | MPO       | Isoform H17 of Myeloperoxidase                                           |
|                     | 1340,74         | MRPL4     | Isoform 1 of 39S ribosomal protein L4, mitochondrial                     |

d.n.f: data not found

Table S7. Protein inference after *m/z* filtering from top25 hippocampus 12m

| Mass ( <i>m/z</i> ) | Near Mass Match | Gene name | Protein name                                                                       |
|---------------------|-----------------|-----------|------------------------------------------------------------------------------------|
| 748,42              | 748,42          | d.n.f     | IPI00645488-R                                                                      |
| 1339,72             | 1339,72         | P4HA2     | Isoform IIa of Prolyl 4-hydroxylase subunit alpha-2                                |
|                     | 1339,72         | ETFB      | Isoform 1 of Electron transfer flavoprotein subunit beta                           |
|                     | 1339,72         | FASN      | Fatty acid synthase                                                                |
| 1153,62             | 1153,62         | ACADM     | Isoform 1 of Medium-chain specific acyl-CoA dehydrogenase, mitochondrial           |
|                     | 1153,62         | MRC1      | Macrophage mannose receptor 1                                                      |
| 1339,74             | 1339,73         | ITGA5     | Integrin alpha-5                                                                   |
|                     | 1339,73         | FKBP4     | FK506-binding protein 4                                                            |
| 1340,74             | 1340,74         | MPO       | Isoform H17 of Myeloperoxidase                                                     |
|                     | 1340,74         | MRPL4     | Isoform 1 of 39S ribosomal protein L4, mitochondrial                               |
| 1154,62             | 1154,62         | LMNB1     | Lamin-B1                                                                           |
|                     | 1154,62         | SYNM      | Isoform 1 of Synemin                                                               |
| 1339,70             | 1339,70         | FAM120A   | Isoform F of Constitutive coactivator of PPAR-gamma-like protein 1                 |
|                     | 1339,70         | LRBA      | Isoform 2 of Lipopolysaccharide-responsive and beige-like anchor protein           |
| 729,40              | 729,41          | HBA1      | Hemoglobin subunit alpha                                                           |
| 748,40              | 748,42          | d.n.f     | IPI00645488-R                                                                      |
| 881,52              | 881,52          | MVP       | Major vault protein                                                                |
| 1153,60             | 1153,60         | RPL34     | 60S ribosomal protein L34                                                          |
|                     | 1153,60         | OXA1L     | Isoform 1 of Mitochondrial inner membrane protein                                  |
|                     | 1153,60         | COPB1     | Coatamer subunit beta                                                              |
|                     | 1153,60         | FTH1      | Ferritin heavy chain                                                               |
|                     | 1153,60         | CHMP4B    | Charged multivesicular body protein 4b                                             |
| 728,42              | 728,43          | COL6A3    | Isoform 1 of Collagen alpha-3(VI) chain                                            |
| 1154,60             | 1154,60         | CAT       | Catalase                                                                           |
|                     | 1154,60         | PLS3      | Plastin-3                                                                          |
|                     | 1154,60         | PLS2      | Plastin-2                                                                          |
| 1153,64             | 1153,63         | THBS2     | Thrombospondin-2                                                                   |
|                     | 1153,63         | COL6A3    | Isoform 1 of Collagen alpha-3(VI) chain                                            |
|                     | 1153,65         | LRRC15    | Leucine-rich repeat-containing protein 15                                          |
| 874,48              | 874,49          | AHCY      | Adenosylhomocysteinase                                                             |
|                     | 874,49          | FABP3     | Fatty acid-binding protein, heart                                                  |
| 1340,76             | 1340,78         | H1-5      | Histone H1.5                                                                       |
|                     | 1340,78         | CFL1      | Cofilin-1                                                                          |
|                     | 1340,78         | CAMK2D    | Isoform Delta 2 of Calcium/calmodulin-dependent protein kinase type II delta chain |
|                     | 1340,78         | CAP1      | Adenylyl cyclase-associated protein                                                |
| 760,42              | 760,40          | HP        | Haptoglobin                                                                        |
| 801,48              | 801,48          | ECH1      | Delta(3,5)-Delta(2,4)-dienoyl-CoA isomerase, mitochondrial                         |
|                     | 801,48          | LAMC1     | Laminin subunit gamma-1                                                            |
|                     | 801,48          | ALDOA     | Fructose-bisphosphate aldolase A                                                   |
| 1339,68             | 1339,68         | OXA1L     | Isoform 1 of Mitochondrial inner membrane protein                                  |
|                     | 1339,68         | PYGB      | Glycogen phosphorylase, brain form                                                 |
|                     | 760,40          | HP        | Haptoglobin                                                                        |
| 1153,58             | 1153,58         | d.n.f     | Isoform Long of ES1 protein homolog, mitochondrial                                 |
| 1144,62             | 1144,62         | CFL1      | Cofilin-1                                                                          |
|                     | 1144,62         | ITIH4     | Isoform 2 of Inter-alpha-trypsin inhibitor heavy chain H4                          |
|                     | 1144,62         | PTER      | Isoform 1 of Phosphotriesterase-related protein                                    |
|                     | 1144,62         | PPP2R5A   | Serine/threonine-protein phosphatase 2A 56 kDa regulatory subunit alpha isoform    |
| 833,44              | 833,45          | FHL1      | Isoform 1 of Four and a half LIM domains protein 1                                 |
| 944,58              | 944,57          | GRHPR     | Glyoxylate reductase/hydroxypyruvate reductase                                     |
|                     | 944,58          | GYG1      | Isoform GN-1L of Glycogenin-1                                                      |
|                     | 944,58          | ACAD9     | Acyl-CoA dehydrogenase family member 9, mitochondrial                              |
|                     | 944,58          | WFS1      | Wolframin                                                                          |
|                     | 944,59          | HNRNPH2   | Heterogeneous nuclear ribonucleoprotein G                                          |
| 870,58              | 870,58          | d.n.f     | IPI00430411-R                                                                      |

d.n.f: data not found

Table S8. Protein inference after *m/z* filtering from heatmap cortex 12m

| Mass ( <i>m/z</i> ) | Near Mass Match | Gene name | Protein name                                                                |
|---------------------|-----------------|-----------|-----------------------------------------------------------------------------|
| 862,46              | 862,47          | DDX1      | ATP-dependent RNA helicase DDX1                                             |
|                     | 862,47          | HADHB     | Trifunctional enzyme subunit beta, mitochondrial                            |
|                     | 862,48          | RABEP1    | Isoform 1 of Rab GTPase-binding effector protein 1                          |
|                     | 862,48          | LGALS3    | Galectin-3                                                                  |
|                     | 862,48          | GOT1      | Aspartate aminotransferase, cytoplasmic                                     |
|                     | 862,48          | CDK5      | Cell division protein kinase 5                                              |
| 1204,62             | 862,48          | d.n.f     | Putative uncharacterized protein RENBP                                      |
|                     | 1204,62         | COL6A3    | COL6A3 protein                                                              |
|                     | 1204,62         | VCL       | Isoform 1 of Vinculin                                                       |
|                     | 1204,62         | CKM       | Creatine kinase M-type                                                      |
|                     | 1204,62         | FH        | Isoform Mitochondrial of Fumarate hydratase, mitochondrial                  |
| 881,50              | 881,50          | RPL15     | 60S ribosomal protein L15                                                   |
| 760,38              | 881,49          | DMBT1     | Isoform 1 of Deleted in malignant brain tumors 1 protein                    |
|                     | 760,40          | HP        | Haptoglobin                                                                 |
| 1165,56             | 1165,56         | LRPPRC    | Leucine-rich PPR motif-containing protein, mitochondrial                    |
| 863,46              | 863,46          | ECHS1     | Enoyl-CoA hydratase, mitochondrial                                          |
| 1298,64             | 863,46          | NUP93     | Nuclear pore complex protein Nup93                                          |
|                     | 1298,64         | ECH1      | Delta(3,5)-Delta(2,4)-dienoyl-CoA isomerase, mitochondrial                  |
|                     | 1298,65         | PKP2      | Isoform 1 of Plakophilin-2                                                  |
| 839,44              | 1298,63         | KRT5      | Keratin, type II cytoskeletal 5                                             |
|                     | 839,44          | SMDT1     | UPF0466 protein C22orf32, mitochondrial                                     |
|                     | 839,44          | MMP9      | Matrix metalloproteinase-9                                                  |
|                     | 839,44          | SMDT1     | UPF0466 protein C22orf32, mitochondrial                                     |
| 809,42              | 809,42          | ANXA1     | Annexin A1                                                                  |
|                     | 809,42          | UQCRC1    | Cytochrome b-c1 complex subunit 1, mitochondrial                            |
|                     | 809,42          | MUC6      | Mucin 6, gastric                                                            |
|                     | 809,43          | FLNA      | Isoform 2 of Filamin-A                                                      |
| 792,38              | 792,36          | ACTN1     | Actinin, alpha 1 isoform a                                                  |
|                     | 792,40          | NEXN      | Isoform 1 of Nexilin                                                        |
| 966,48              | 966,48          | d.n.f     | cDNA FLJ51518, highly similar to Annexin A11                                |
|                     | 966,48          | EPRS      | Bifunctional aminoacyl-tRNA synthetase                                      |
|                     | 966,49          | NCBP1     | Nuclear cap-binding protein subunit 1                                       |
|                     | 966,49          | RPL10A    | 60S ribosomal protein L10a                                                  |
|                     | 966,49          | MYH2      | Myosin-2                                                                    |
| 761,40              | 761,40          | MYH2      | Myosin-2                                                                    |
|                     | 761,42          | PLIN3     | Isoform B of Perilipin-3                                                    |
|                     | 761,42          | AIFM1     | Isoform 1 of Apoptosis-inducing factor 1, mitochondrial                     |
| 1205,62             | 1205,62         | LAMB2     | Laminin subunit beta-2                                                      |
|                     | 1205,62         | FAM83H    | Protein FAM83H                                                              |
| 775,42              | 775,42          | RAB8B     | Ras-related protein Rab-8B                                                  |
|                     | 775,42          | RAB1A     | Isoform 1 of Ras-related protein Rab-1A                                     |
|                     | 775,42          | RPS18     | 40S ribosomal protein S18                                                   |
| 938,48              | 938,48          | EHD4      | EH domain-containing protein 4                                              |
|                     | 938,48          | CLTC      | Isoform 1 of Clathrin heavy chain 1                                         |
|                     | 938,48          | GC        | Isoform 1 of Vitamin D-binding protein                                      |
| 890,46              | 890,46          | CLTC      | Isoform 1 of Clathrin heavy chain 1                                         |
|                     | 890,46          | KRT18     | Keratin, type I cytoskeletal 18                                             |
|                     | 890,46          | HSPB7     | Isoform 2 of Heat shock protein beta-7                                      |
|                     | 890,48          | HMGCL     | Hydroxymethylglutaryl-CoA lyase, mitochondrial                              |
|                     | 890,48          | HMGCL     | Hydroxymethylglutaryl-CoA lyase, mitochondrial                              |
| 762,40              | 762,41          | KRT19     | Keratin, type I cytoskeletal 19                                             |
|                     | 762,41          | EEF1G     | Elongation factor 1-gamma                                                   |
|                     | 762,39          | TGFB1I1   | Isoform 2 of Transforming growth factor beta-1-induced transcript 1 protein |
| 994,50              | 994,50          | d.n.f     | G1 to S phase transition 1 isoform 2                                        |
|                     | 994,50          | MYH10     | Isoform 1 of Myosin-10                                                      |
|                     | 994,50          | RPL6      | 60S ribosomal protein L6                                                    |
|                     | 994,50          | DCXR      | L-xylulose reductase                                                        |
|                     | 994,51          | GLUL      | Glutamine synthetase                                                        |
| 893,48              | 893,48          | d.n.f     | Isoform 1 of Uncharacterized protein C9orf142                               |
| 923,50              | 923,49          | NDUFA7    | NADH dehydrogenase [ubiquinone] 1 alpha subcomplex subunit 7                |
|                     | 923,50          | AKR1C1    | Aldo-keto reductase family 1 member C1                                      |
|                     | 923,52          | SLC25A5   | ADP/ATP translocase 2                                                       |
| 808,38              | 808,38          | ENO1      | Isoform alpha-enolase of Alpha-enolase                                      |
| 1166,58             | 1166,58         | SULT1A1   | Sulfotransferase 1A2                                                        |
|                     | 1166,58         | d.n.f     | Phenol sulfotransferase 1A5*1A possible alternative splicing form           |
|                     | 1166,58         | APCS      | Serum amyloid P-component                                                   |

|         |         |        |                                                                         |
|---------|---------|--------|-------------------------------------------------------------------------|
| 1135,58 | 1135,58 | SPTAN1 | Isoform 1 of Spectrin alpha chain, brain                                |
|         | 1135,58 | FKBP4  | FK506-binding protein 4                                                 |
| 1165,58 | 1165,58 | KRT10  | Keratin, type I cytoskeletal 10                                         |
|         | 1165,58 | TXN    | Thioredoxin                                                             |
|         | 1165,58 | PMVK   | Phosphomevalonate kinase                                                |
|         | 1165,58 | d.n.f  | cDNA, FLJ93744, highly similar to Homo sapiens keratin 6E (KRT6E), mRNA |
|         | 1165,58 | PMVK   | Phosphomevalonate kinase                                                |
|         | 1165,58 | DSP    | Isoform DPI of Desmoplakin                                              |
| 805,42  | 805,42  | TSPAN8 | Tetraspanin-8                                                           |
|         | 805,42  | FKBP10 | FK506-binding protein 10                                                |
| 1354,62 | 1354,62 | d.n.f  | cDNA FLJ59211, highly similar to Glucosidase 2 subunit beta             |
|         | 1354,62 | CPT2   | Carnitine O-palmitoyltransferase 2, mitochondrial                       |
|         | 1354,62 | ACTB   | Actin, cytoplasmic 1                                                    |
|         | 1354,62 | VAT1   | Synaptic vesicle membrane protein VAT-1 homolog                         |
| 1355,64 | 1355,64 | d.n.f  | 59 kDa protein                                                          |
|         | 1355,64 | ACSL3  | Long-chain-fatty-acid--CoA ligase 3                                     |
| 1354,64 | 1354,64 | CA2    | Carbonic anhydrase 2                                                    |
|         | 1354,64 | PALLD  | Isoform 4 of Palladin                                                   |
|         | 1354,64 | RAB4A  | RAB4A, member RAS oncogene family variant                               |
| 1392,74 | 1392,74 | KRT6A  | Keratin, type II cytoskeletal 6A                                        |
| 1391,74 | 1391,74 | CCT5   | T-complex protein 1 subunit epsilon                                     |
|         | 1391,74 | GARS   | Glycyl-tRNA synthetase                                                  |
| 1295,60 | 1295,61 | TAGLN  | Transgelin                                                              |
|         | 1295,59 | TTN    | Titin isoform N2-A                                                      |
| 1391,72 | 1391,72 | ATP2A1 | Isoform SERCA1B of Sarcoplasmic/endoplasmic reticulum calcium ATPase 1  |
|         | 1391,72 | EIF3A  | Eukaryotic translation initiation factor 3 subunit A                    |
| 1392,72 | 1392,72 | CRP    | Isoform 1 of C-reactive protein                                         |
|         | 1392,72 | TALDO1 | Transaldolase                                                           |
|         | 1392,72 | COL6A1 | Collagen alpha-1(VI) chain                                              |

d.n.f: data not found

Table S9. Protein inference after *m/z* filtering from top25 cortex 12m

| Mass ( <i>m/z</i> ) | Near Mass Match | Gene name | Protein name                                                                                    |
|---------------------|-----------------|-----------|-------------------------------------------------------------------------------------------------|
| 809,44              | 809,44          | EEF1A2    | Elongation factor 1-alpha 2                                                                     |
|                     | 809,44          | DSP       | Isoform DPI of Desmoplakin                                                                      |
|                     | 809,44          | KRT19     | Keratin, type I cytoskeletal 19                                                                 |
|                     | 809,44          | KRT9      | Keratin, type I cytoskeletal 9                                                                  |
|                     | 809,44          | KRT10     | Keratin, type I cytoskeletal 10                                                                 |
|                     | 809,44          | KRT17     | Keratin, type I cytoskeletal 17                                                                 |
|                     | 809,44          | KRT14     | Keratin, type I cytoskeletal 14                                                                 |
|                     | 809,44          | KRT16     | Keratin, type I cytoskeletal 16                                                                 |
|                     | 809,44          | TRA2B     | Isoform 1 of Transformer-2 protein homolog beta                                                 |
|                     | 809,44          | KRT15     | Keratin, type I cytoskeletal 15                                                                 |
| 862,46              | 862,45          | TNNI1     | Troponin I, slow skeletal muscle                                                                |
|                     | 862,47          | DDX1      | ATP-dependent RNA helicase                                                                      |
|                     | 862,47          | HADHB     | Trifunctional enzyme subunit beta, mitochondrial                                                |
| 1391,74             | 1391,74         | CCT5      | T-complex protein 1 subunit epsilon                                                             |
|                     | 1391,74         | GARS1     | Glycyl-tRNA synthetase                                                                          |
| 1391,76             | 1391,76         | PGD       | 6-phosphogluconate dehydrogenase, decarboxylating                                               |
| 850,58              | 850,53          | H2AC18    | Histone H2A type 2-A                                                                            |
|                     | 850,53          | H2AC1     | Histone H2A type 1-A                                                                            |
|                     | 850,53          | H2AZ2     | Histone H2A.V                                                                                   |
|                     | 850,53          | H2AC6     | Histone H2A type 1-C                                                                            |
| 959,58              | 959,59          | TP53I3    | Isoform 1 of Quinone oxidoreductase PIG3                                                        |
|                     | 959,59          | H3Y1      | Histone H3.1                                                                                    |
|                     | 959,59          | d.n.f     | 18 kDa protein                                                                                  |
| 881,50              | 881,50          | RPL15     | 60S ribosomal protein L15                                                                       |
|                     | 881,52          | MVP       | Major vault protein                                                                             |
| 1391,72             | 1391,72         | ATP2A2    | Isoform SERCA2B of Sarcoplasmic/endoplasmic reticulum calcium ATPase 2                          |
|                     | 1391,72         | ATP2A1    | Isoform SERCA1B of Sarcoplasmic/endoplasmic reticulum calcium ATPase 1                          |
|                     | 1391,72         | ATP2A3    | Isoform SERCA3B of Sarcoplasmic/endoplasmic reticulum calcium ATPase 3                          |
|                     | 1391,72         | EIF2A     | Eukaryotic translation initiation factor 3 subunit A                                            |
| 1295,62             | 1295,62         | SMC1A     | Structural maintenance of chromosomes protein 1A                                                |
|                     | 1295,62         | C11orf54  | Isoform 1 of Ester hydrolase C11orf54                                                           |
| 841,48              | 841,48          | USP27X    | Ubiquitin carboxyl-terminal hydrolase 14                                                        |
|                     | 841,49          | CLCA1     | Calcium-activated chloride channel regulator 1                                                  |
| 1354,64             | 1354,64         | CA2       | Carbonic anhydrase 2                                                                            |
|                     | 1354,64         | PALLD     | Isoform 4 of Palladin                                                                           |
|                     | 1354,64         | RAB4A     | Ras-related protein Rab-4A                                                                      |
| 743,46              | 743,47          | AP2B1     | Isoform B of AP-2 complex subunit alpha-1                                                       |
|                     | 743,47          | AP2A1     | Isoform 2 of AP-2 complex subunit alpha-2                                                       |
| 1295,62             | 1295,61         | TAGLN     | Transgelin                                                                                      |
| 760,36              | 760,40          | HP        | Haptoglobin                                                                                     |
| 1202,64             | 1202,64         | TALDO1    | Transaldolase                                                                                   |
| 1355,64             | 1355,64         | d.n.f     | 59 kDa protein                                                                                  |
|                     | 1355,64         | SLC27A3   | Long-chain-fatty-acid--CoA ligase 3                                                             |
| 862,44              | 862,45          | TNNI1     | Troponin I, slow skeletal muscle                                                                |
| 1355,66             | 1355,66         | PPP1R12C  | Isoform 1 of Protein phosphatase 1 regulatory subunit 12C                                       |
|                     | 1355,66         | TUBB2A    | Tubulin beta-2A chain                                                                           |
|                     | 1355,66         | TTN       | Titin isoform N2-A                                                                              |
| 743,44              | 743,44          | TPSAB1    | Na+/K+ -ATPase alpha 1 subunit isoform c                                                        |
|                     | 743,44          | G6PD      | Isoform Long of Glucose-6-phosphate 1-dehydrogenase                                             |
|                     | 743,44          | LRBA      | Isoform 2 of Lipopolysaccharide-responsive and beige-like anchor protein                        |
|                     | 743,44          | GMPR2     | GMP reductase 2                                                                                 |
|                     | 743,44          | ITGB7     | Integrin beta-2                                                                                 |
| 840,48              | 840,49          | SF3B3     | Isoform 1 of Splicing factor 3B subunit 3                                                       |
| 1127,56             | 1127,56         | VPS35     | Vacuolar protein sorting-associated protein 35                                                  |
| 731,40              | 731,40          | d.n.f     | cDNA FLJ56425, highly similar to Very-long-chain specific acyl-CoA dehydrogenase, mitochondrial |
|                     | 731,40          | GPI       | Glucose-6-phosphate isomerase                                                                   |
|                     | 731,40          | d.n.f     | Gelsolin-like capping protein                                                                   |
|                     | 731,40          | FH        | Isoform Mitochondrial of Fumarate hydratase, mitochondrial                                      |
|                     | 731,40          | d.n.f     | Uncharacterized protein C6orf203                                                                |
| 833,42              | 833,42          | VCL       | Isoform 1 of Vinculin                                                                           |
| 808,38              | 808,38          | ENO1      | Isoform alpha-enolase of Alpha-enolase                                                          |
| 1296,62             | 1296,61         | PLEC      | Isoform 4 of Plectin-1                                                                          |
|                     | 1296,61         | UBE2L3    | Ubiquitin-conjugating enzyme E2 L3                                                              |
|                     | 1296,61         | SPTBN1    | Isoform Long of Spectrin beta chain, brain 1                                                    |
|                     | 1296,63         | PCCA      | Propionyl-Coenzyme A carboxylase, alpha polypeptide isoform a precursor                         |
|                     | 1296,63         | DDX39B    | Isoform 1 of Spliceosome RNA helicase                                                           |
|                     | 1296,63         | d.n.f     | cDNA FLJ55484, highly similar to ATP-dependent RNA helicase DDX39                               |

d.n.f: data not found

Table S10. List of antibodies used in this study.

| Antibody         | Host animal             | Work dilution | Reference (Cat #) | Company                   | Secondary antibody                                                         |
|------------------|-------------------------|---------------|-------------------|---------------------------|----------------------------------------------------------------------------|
| ACAD9            | Rabbit / IgG polyclonal | 1:50-1:100    | PA5-76270         | Thermo Fisher Scientific  | 1:200 Alexa Fluor® 488 donkey anti-rabbit. Invitrogen (Massachusetts, USA) |
| ACSL3            | Mouse / IgG monoclonal  | 1:50-1:500    | sc-166374         | Santa Cruz Biotechnology  | 1:200 Alexa Fluor® 488 chicken anti-mouse. Invitrogen (Massachusetts, USA) |
| COL6A3           | Rabbit / IgG polyclonal | 1:100-1:200   | ab231025          | Abcam                     | 1:200 Alexa Fluor® 488 donkey anti-rabbit. Invitrogen (Massachusetts, USA) |
| Thioredoxin 1    | Rabbit / IgG polyclonal | 1:100-1:200   | 2429              | Cell Signaling Technology | 1:200 Alexa Fluor® 488 donkey anti-rabbit. Invitrogen (Massachusetts, USA) |
| Catalase         | Mouse / IgG monoclonal  | 1:50-1:500    | sc-271803         | Santa Cruz Biotechnology  | 1:200 Alexa Fluor® 488 chicken anti-mouse. Invitrogen (Massachusetts, USA) |
| CA II            | Mouse / IgG monoclonal  | 1:50-1:500    | sc-48351          | Santa Cruz Biotechnology  | 1:200 Alexa Fluor® 488 chicken anti-mouse. Invitrogen (Massachusetts, USA) |
| COPG             | Mouse / IgG monoclonal  | 1:50-1:500    | sc-271362         | Santa Cruz Biotechnology  | 1:200 Alexa Fluor® 488 chicken anti-mouse. Invitrogen (Massachusetts, USA) |
| MPO light chain  | Mouse / IgG monoclonal  | 1:50-1:500    | sc-390109         | Santa Cruz Biotechnology  | 1:200 Alexa Fluor® 488 chicken anti-mouse. Invitrogen (Massachusetts, USA) |
| Prohibitin 2     | Mouse / IgG monoclonal  | 1:50-1:500    | sc-133094         | Santa Cruz Biotechnology  | 1:200 Alexa Fluor® 488 chicken anti-mouse. Invitrogen (Massachusetts, USA) |
| TCP-1 $\epsilon$ | Mouse / IgG monoclonal  | 1:50-1:500    | sc-376188         | Santa Cruz Biotechnology  | 1:200 Alexa Fluor® 488 chicken anti-mouse. Invitrogen (Massachusetts, USA) |
| Transgelin       | Mouse / IgG monoclonal  | 1:50-1:500    | sc-53932          | Santa Cruz Biotechnology  | 1:200 Alexa Fluor® 488 chicken anti-mouse. Invitrogen (Massachusetts, USA) |
| Vinculin         | Mouse / IgG monoclonal  | 1:100-1:200   | 14977782          | Thermo Fisher Scientific  | 1:200 Alexa Fluor® 488 chicken anti-mouse. Invitrogen (Massachusetts, USA) |
| PDI              | Mouse / IgG monoclonal  | 1:50-1:500    | sc-74551          | Santa Cruz Biotechnology  | 1:200 Alexa Fluor® 488 chicken anti-mouse. Invitrogen (Massachusetts, USA) |
| PRDX1            | Rabbit / IgG polyclonal | 1:200-1:250   | PA3-750           | Thermo Fisher Scientific  | 1:200 Alexa Fluor® 488 donkey anti-rabbit. Invitrogen (Massachusetts, USA) |
| HADHA            | Rabbit / IgG polyclonal | 1:100-1:1000  | SAB2700479        | Merck                     | 1:200 Alexa Fluor® 488 donkey anti-rabbit. Invitrogen (Massachusetts, USA) |
| HSPA8            | Rabbit / IgG polyclonal | 1:100-1:1000  | SAB2701964        | Merck                     | 1:200 Alexa Fluor® 488 donkey anti-rabbit. Invitrogen (Massachusetts, USA) |
| RPL23            | Rabbit / IgG polyclonal | 1:50-1:200    | NBP1-87847        | Novus Biologicals         | 1:200 Alexa Fluor® 488 donkey anti-rabbit. Invitrogen (Massachusetts, USA) |
| RPL13A           | Rabbit / IgG polyclonal | 1:50-1:200    | NBP1-92345        | Novus Biologicals         | 1:200 Alexa Fluor® 488 donkey anti-rabbit. Invitrogen (Massachusetts, USA) |
| RPL30            | Rabbit / IgG polyclonal | 1:50-1:100    | PA5-89360         | Thermo Fisher Scientific  | 1:200 Alexa Fluor® 488 donkey anti-rabbit. Invitrogen (Massachusetts, USA) |
| RPL17            | Rabbit / IgG polyclonal | 1:50-1:200    | SAB4500019        | Thermo Fisher Scientific  | 1:200 Alexa Fluor® 488 donkey anti-rabbit. Invitrogen (Massachusetts, USA) |
| RPL15            | Rabbit / IgG polyclonal | 1:100-1:500   | PA5-106578        | Thermo Fisher Scientific  | 1:200 Alexa Fluor® 488 donkey anti-rabbit. Invitrogen (Massachusetts, USA) |
| PPP2R5A          | Rabbit / IgG polyclonal | 1:100-1:500   | PA5-106739        | Thermo Fisher Scientific  | 1:200 Alexa Fluor® 488 donkey anti-rabbit. Invitrogen (Massachusetts, USA) |
| DYNC1H1          | Rabbit / IgG polyclonal | 1:100-1:500   | PA5-115149        | Thermo Fisher Scientific  | 1:200 Alexa Fluor® 488 donkey anti-rabbit. Invitrogen (Massachusetts, USA) |
| Exportin-1/CRM1  | Rabbit / IgG polyclonal | 1:200-1:800   | 46249             | Cell Signaling Technology | 1:200 Alexa Fluor® 488 donkey anti-rabbit. Invitrogen (Massachusetts, USA) |
| eIF3a            | Rabbit / IgG polyclonal | 1:100-1:500   | PA5-17212         | Thermo Fisher Scientific  | 1:200 Alexa Fluor® 488 donkey anti-rabbit. Invitrogen (Massachusetts, USA) |

Table S11. Sequence alignment analysis by BLAST.

|                 | m/z MALDI | Protein name | Human sequence | Mouse sequence | Query Cover | E value  | % identity |
|-----------------|-----------|--------------|----------------|----------------|-------------|----------|------------|
| Hippocampus 6m  | 920,50    | PRDX1        | GLFIIDDK       | GLFIIDDK       | 1,00        | 0,05     | 1          |
|                 | 955,57    | P4HB         | ILEFFGLK       | ILEFFGLK       | 1,00        | 0,05     | 1          |
|                 | 1039,56   | DYNC1H1      | TMTLFSALR      | TMTLFSALR      | 1,00        | 0,01     | 1          |
|                 | 1040,55   | HADHA        | FVDLYGAQK      | FVDLYGAQK      | 1,00        | 0,01     | 1          |
|                 | 1109,60   | COPG1        | VVLEHEEVR      | VVLEHEEVR      | 1,00        | 0,00     | 1          |
|                 | 1154,60   | CAT          | LCENIAGHLK     | LCENIAGHLK     | 1,00        | 0,00     | 1          |
|                 | 1154,60   | COL6A3       | SSIMAFAGNK     | SIMALAVGSK     | 0,90        | 5,80     | 0,7        |
| Cortex 6m       | 838,45    | VCL          | GLVAEGHR       | GLVAEGHR       | 1           | 0,18     | 1          |
|                 | 858,45    | HSPA8        | GTLDPVEK       | GTLDPVEK       | 1,00        | 0,13     | 1          |
|                 | 1064,60   | RPL23A       | KLYDIDVAK      | KLYDIDVAK      | 1,00        | 0,01     | 1          |
|                 | 1202,65   | PHB2         | DLQMVNISLR     | DLQMVNISLR     | 1,00        | 0,00     | 1          |
|                 | 1355,65   | ACSL3        | NTPLCDFVFR     | TPLCDFVFR      | 0,90        | 0,00     | 0,9        |
|                 | 1204,64   | RPL17        | SAEFLHMLK      | SAEFLHMLK      | 1,00        | 0,00     | 1          |
| Hippocampus 12m | 1340,7    | XPO1         | SAFPHLQDAQVK   | SAFPHLQDAQVK   | 1           | 0,000006 | 1          |
|                 | 1340,74   | MPO          | IGLDLPALNMQR   | IGLDLPALNMQR   | 1,00        | 0,00     | 1          |
|                 | 1144,62   | PPP2R5A      | DTTLTEPVIR     | DTTLTEPVIR     | 1,00        | 0,00     | 1          |
|                 | 944,58    | ACAD9        | TVETLLLR       | TVETLLLR       | 1,00        | 0,13     | 1          |
| Cortex 12m      | 1354,64   | CAII         | GKSADFTNFDPR   | GKRAAFANFDP    | 0,91        | 1,2      | 0,7273     |
|                 | 1165,58   | TXN          | VGEFSGANKEK    | VGEFSGANKEK    | 1,00        | 0,00     | 1          |
|                 | 1391,72   | EIF3A        | QPALDVLYDVMK   | QPALDVLYDVMK   | 1,00        | 0,00     | 1          |
|                 | 881,50    | RPL15        | NTLQLHR        | NTLQLHR        | 1,00        | 0,43     | 1          |
|                 | 1204,32   | VCL          | DIAKASDEVTR    | DIAKASDEVTR    | 1,00        | 0,00     | 1          |
|                 | 1295,60   | TAGLN        | EFTESQLQEGK    | DFTDSQLQEGK    | 1,00        | 0,00     | 0,8182     |

A table view with one row per hit, showing the accession number with BLAST output scores.

Query Coverage represents the percent of the query length that is included in the aligned segments.

E[xpect] Value represents the number of alignments expected by chance with the calculated score or better. The expect value is the default sorting metric; for significant alignments, the E value should be very close to zero.

% Identity represents the highest percent identity for a set of aligned segments to the same subject sequence.

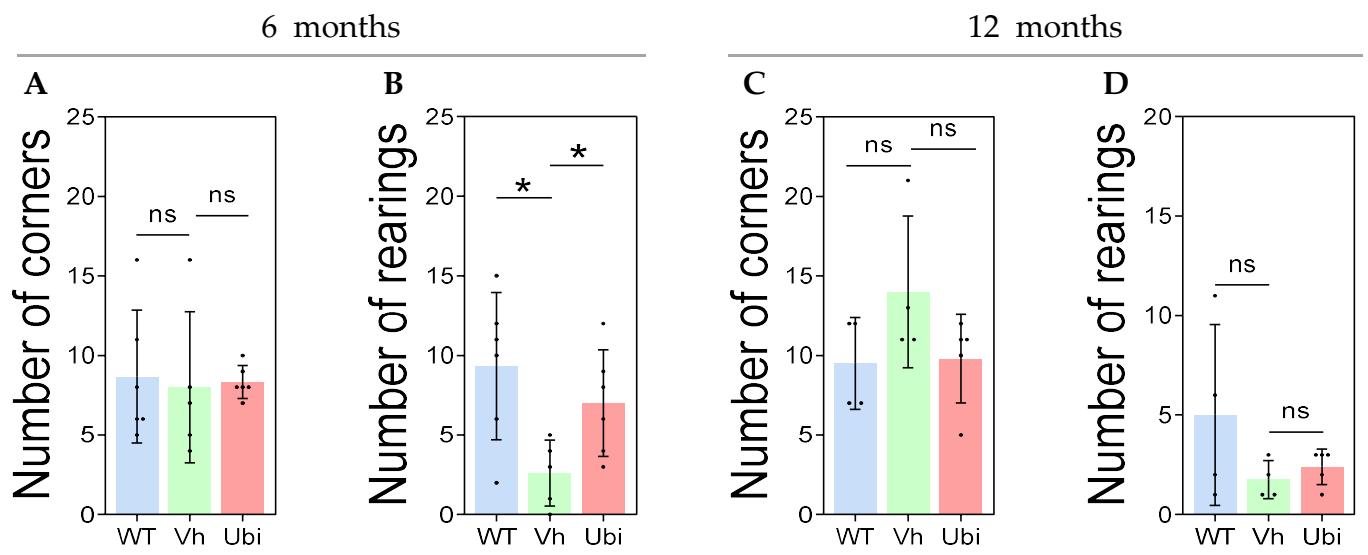

**Figure S1.** (A,C) Exploratory activity of mice in the neophobia test. Each column represents the average number of corners visited by each experimental group ( $n = 6$ ) after 6 (A) or 12 (C) months of age. Values are expressed as mean  $\pm$  S.E.M. \* =  $p < 0.05$ . (B,D) Anxiety levels of the mice studied by the open-field test. Each column represents the average number of rearings performed by each mouse according to its experimental group ( $n = 6$ ), at after 6 (B) or 12 (D) months of age. Values are expressed as mean  $\pm$  S.E.M. \* =  $p < 0.05$ .

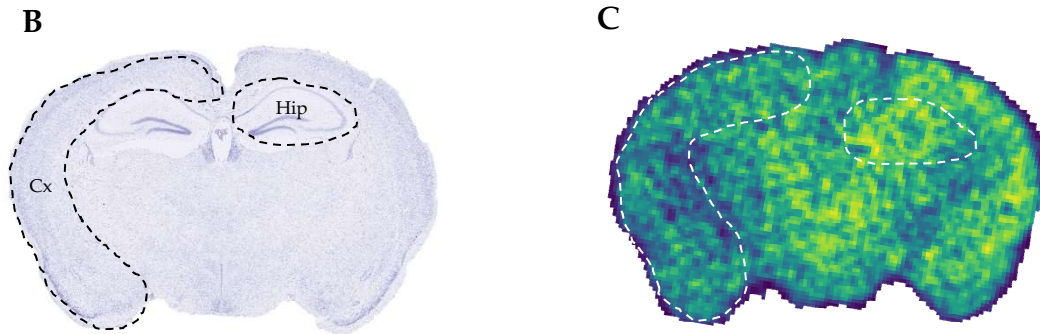

**Figure S2.** (A) Representative Nissl-stained mouse brain tissue section of a 6-m old Vh animal ( $-1.82$  mm from bregma). Annotations: Cx, cortex; Hip, hippocampal region. Each studied region is delineated with a black dashed line. (B) Molecular image of peptide ion detected at  $m/z$  733.2. Each studied region is delineated with a white dashed line.



# Hippocampus 6 months

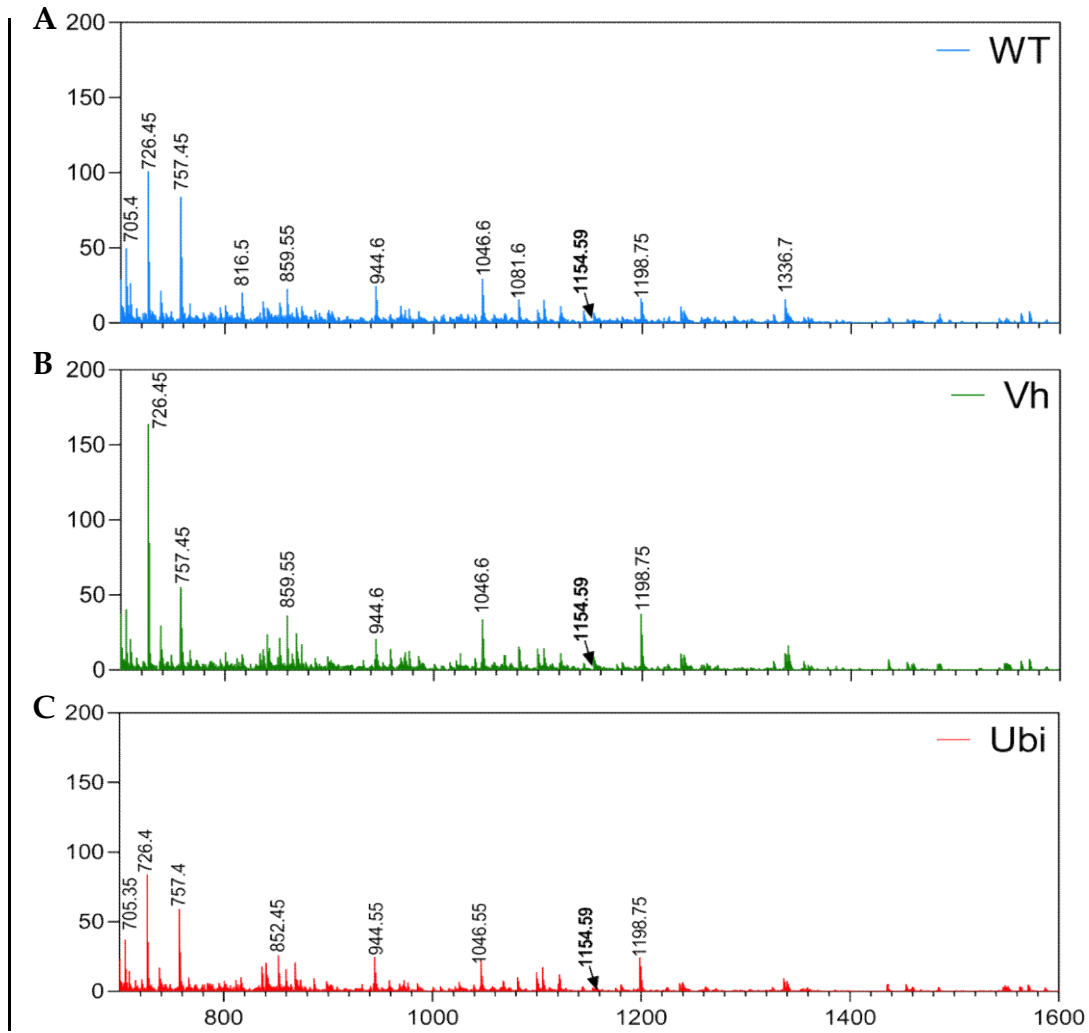

# Cortex 6 months

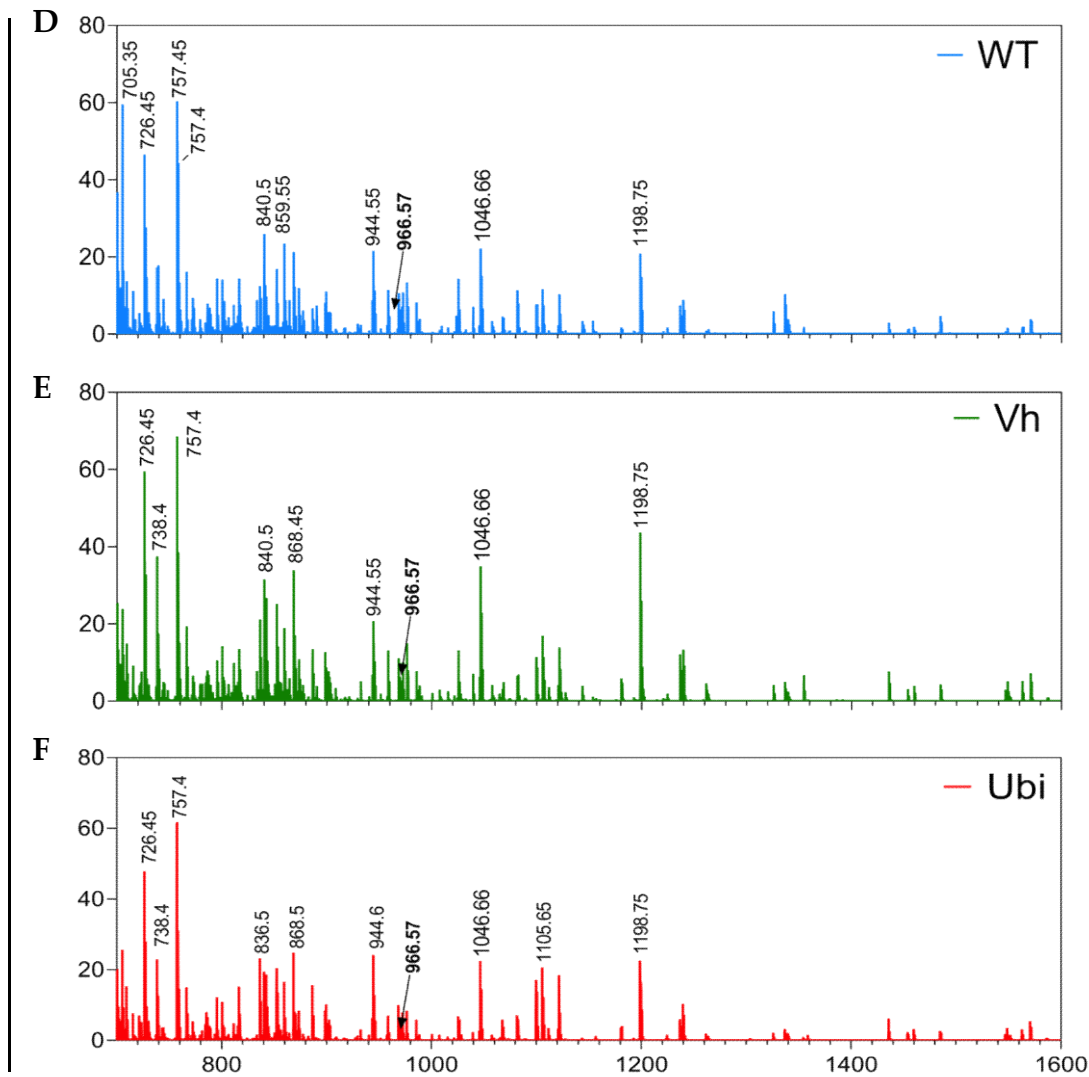

**Figure S3.** Comparison of mass spectra obtained from MALDI-MSI, identified from hippocampus and cortex at 6 months of age within the intact peptide mass range (m/z 700–1600). (A–C) Mass spectrum of hippocampus for WT, Vh and Ubi conditions, respectively. (D–F) Mass spectrum of cortex for WT, Vh and Ubi conditions, respectively. To facilitate comparison, WT spectra are colored in blue, Vh in green and Ubi in red. All spectra presented here are in positive ion mode.

# Hippocampus 12 months

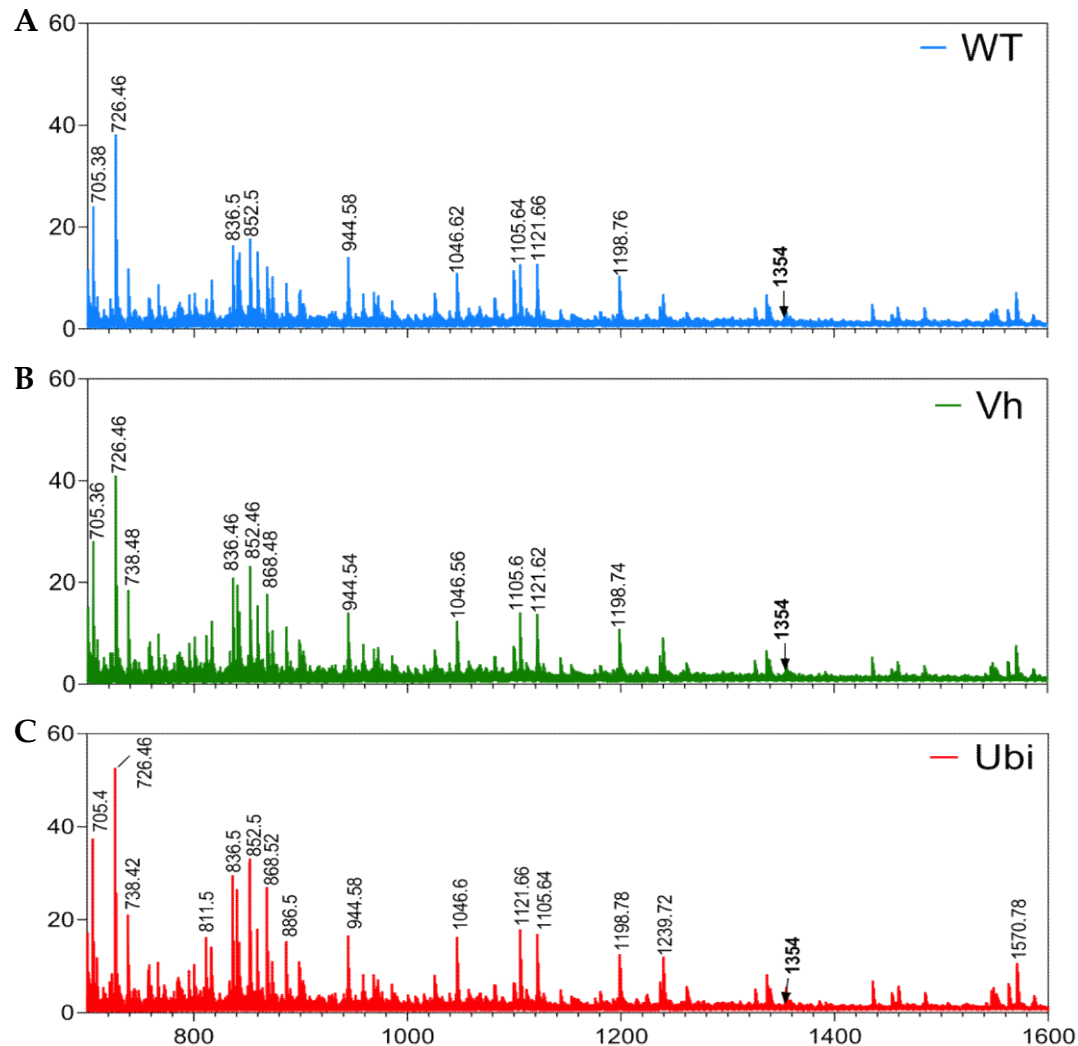

# Cortex 12 months

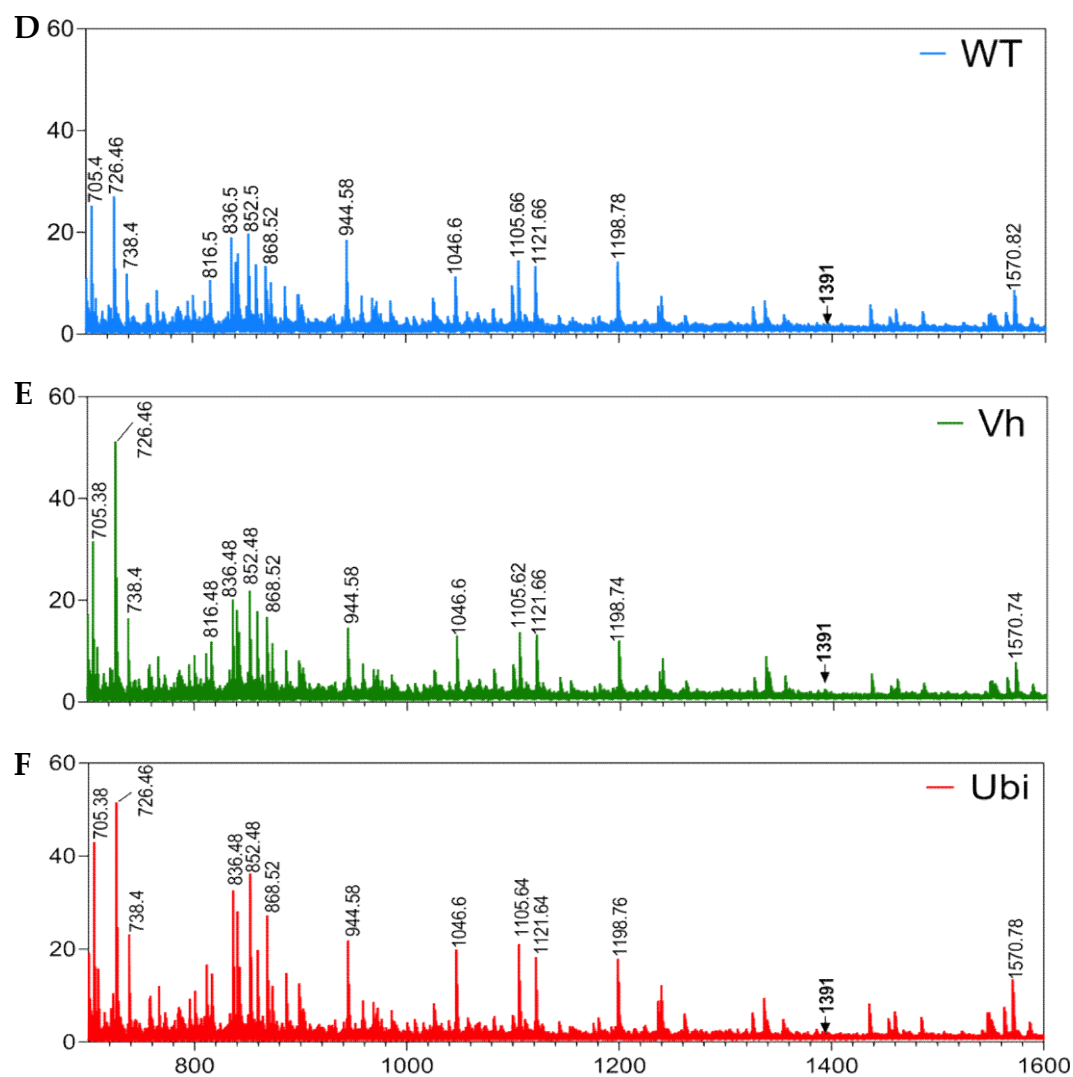

**Figure S4.** Comparison of mass spectra obtained from MALDI-MSI, identified from hippocampus and cortex at 12 months of age within the intact peptide mass range ( $m/z$  700–1600). (A–C) Mass spectrum of hippocampus for WT, Vh and Ubi conditions, respectively. (D–F) Mass spectrum of cortex for WT, Vh and Ubi conditions, respectively. To facilitate comparison, WT spectra are colored in blue, Vh in green and Ubi in red. All spectra presented here are in positive ion mode.

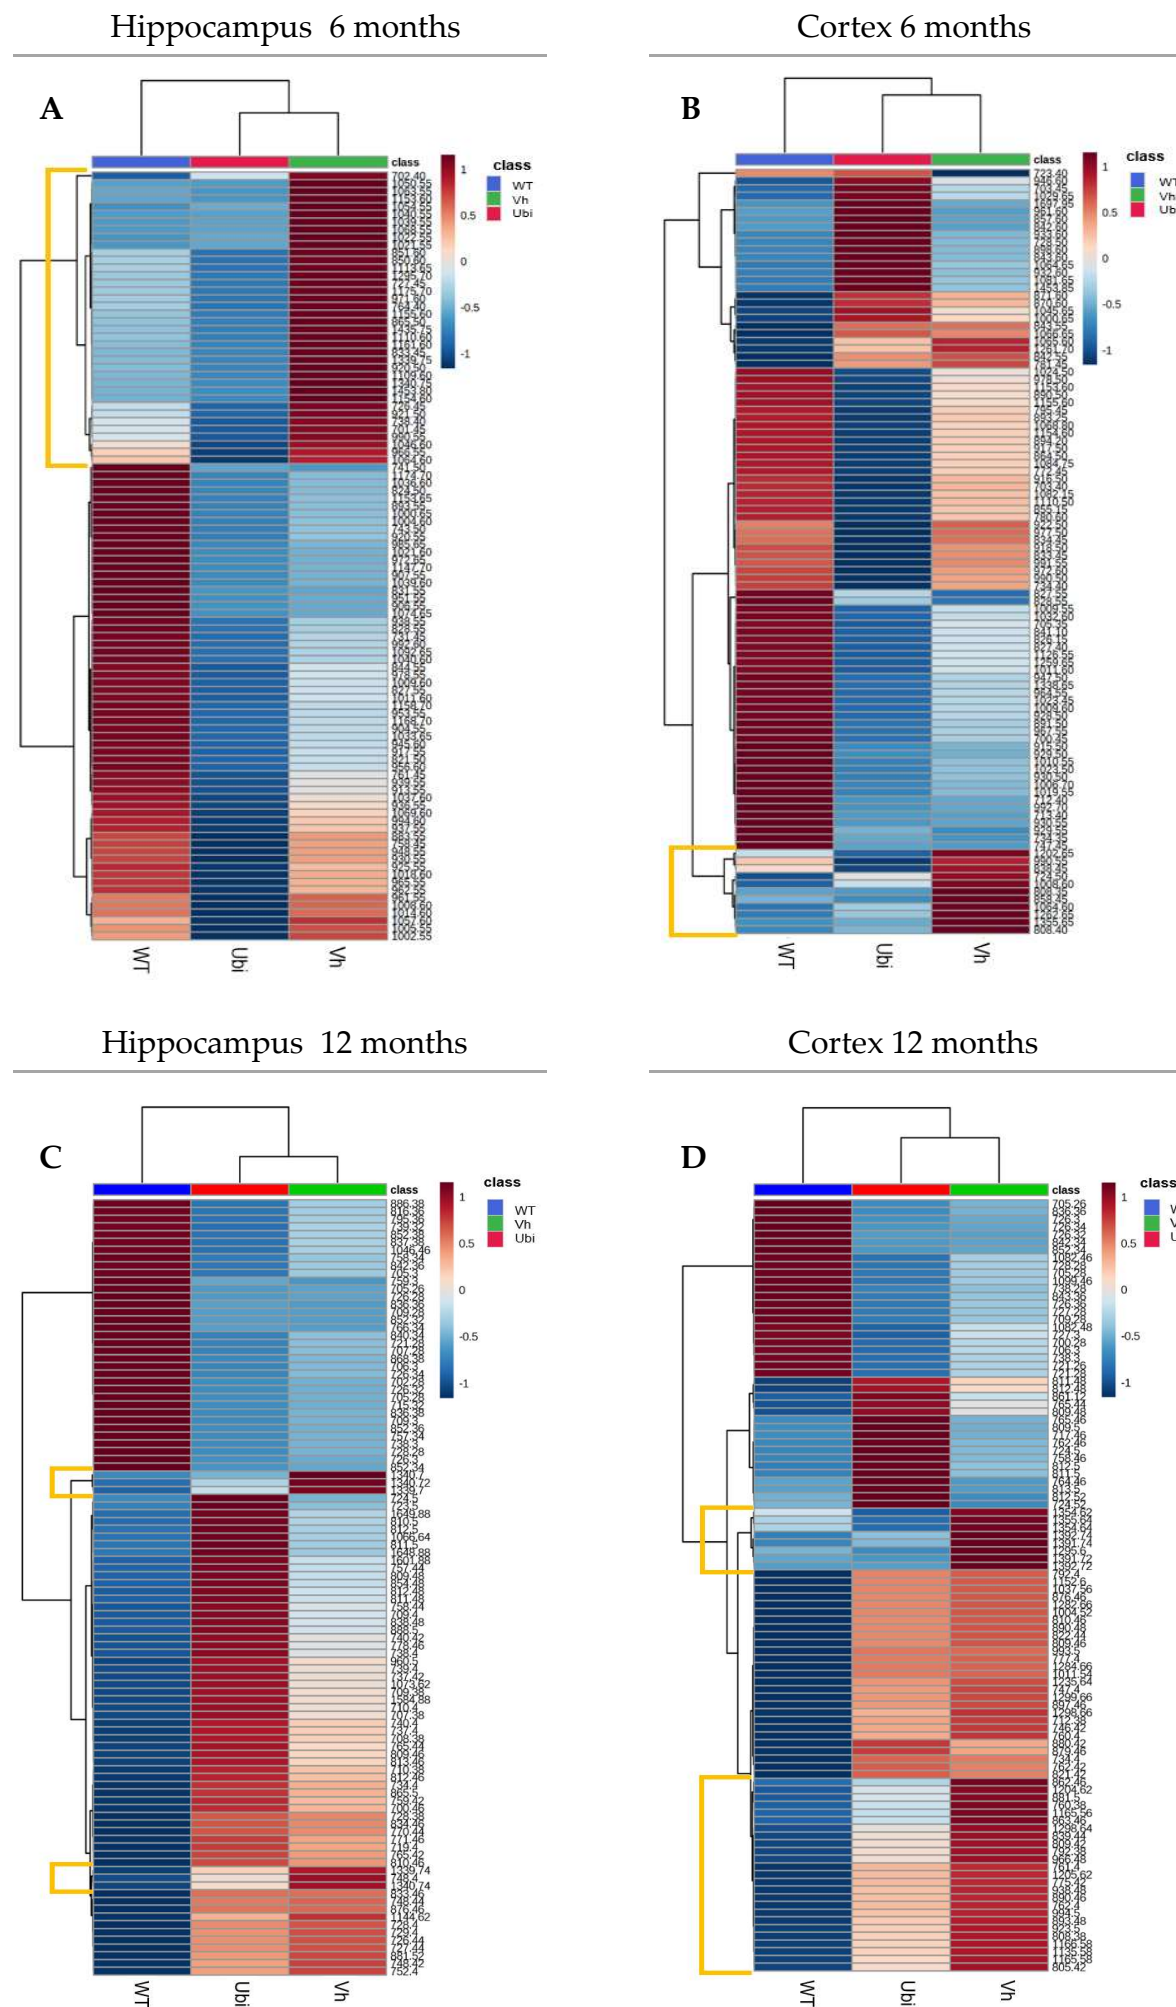

**Figure S5.** Clustered heatmap of the hippocampal 6m (A), cortical 6m (B), hippocampal 12m (C), cortical 12m (D) region performed in MetaboAnalyst 3.0 using intensity data. Each heatmap represents the 100 most significant masses among the experimental conditions and each row represent a mass. Hierarchical ranking was performed using Pearson's correlation coefficient. Relative expression (arbitrary units) is shown in red for high values and in dark blue for low values. Orange brackets refer to those masses selected for further identification to proteins.

## Hippocampus 6 months

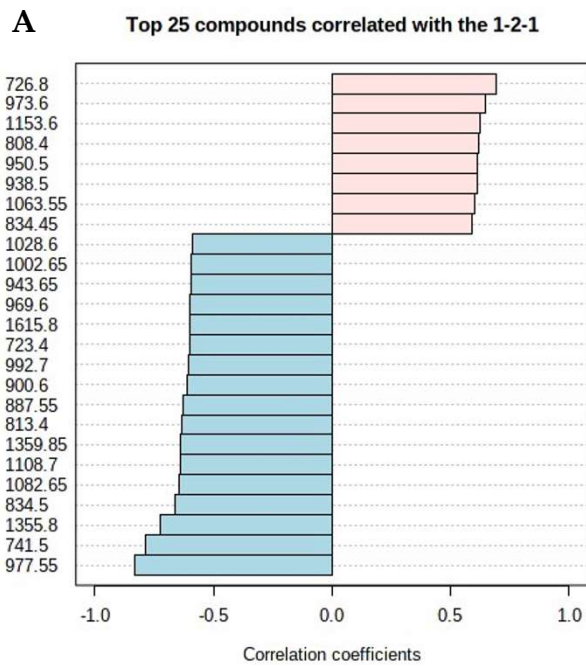

## Cortex 6 months

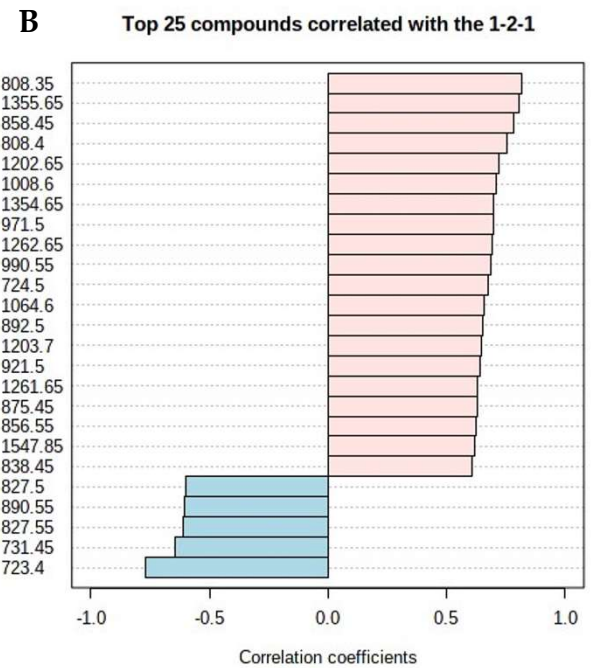

## Hippocampus 12 months

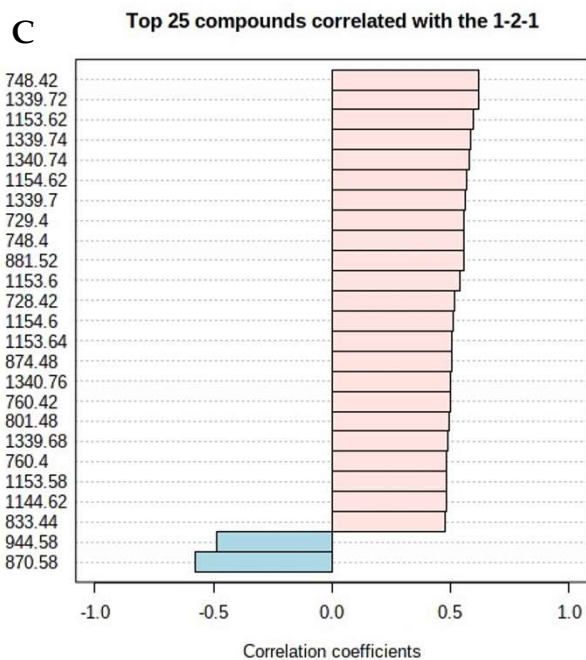

## Cortex 12 months

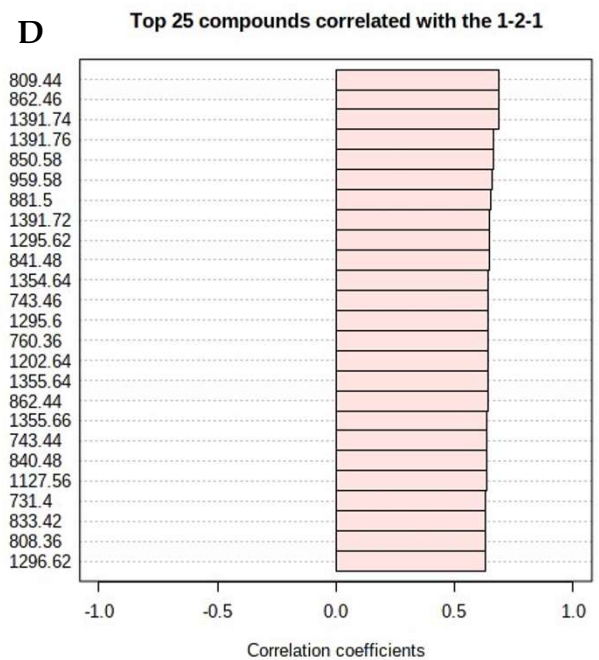

**Figure S6.** Top 25 correlations with the normalized intensity of hippocampal 6m (A), cortical 6m (B), hippocampal 12m (C), cortical 12m (D) area. Correlation analysis identified peptides associated with '1-2-1' pattern (WT vs Vh and Ubi vs Vh). The peptides are represented as horizontal bars, with colors in light pink indicating positive correlations and that in light blue indicating negative correlations.
